# Supplementary material
Source: PubMed Central journal article supplement (PMC7870534)

Appendix 1: Comparisons of lines at Z-score = -2, 0, and +2 for the PHN model (red lines) versus similar lines for the Boston, Italy, and Detroit models (green lines) for all of the parameters (BSA = body surface area, PHN = Pediatric Heart Network).

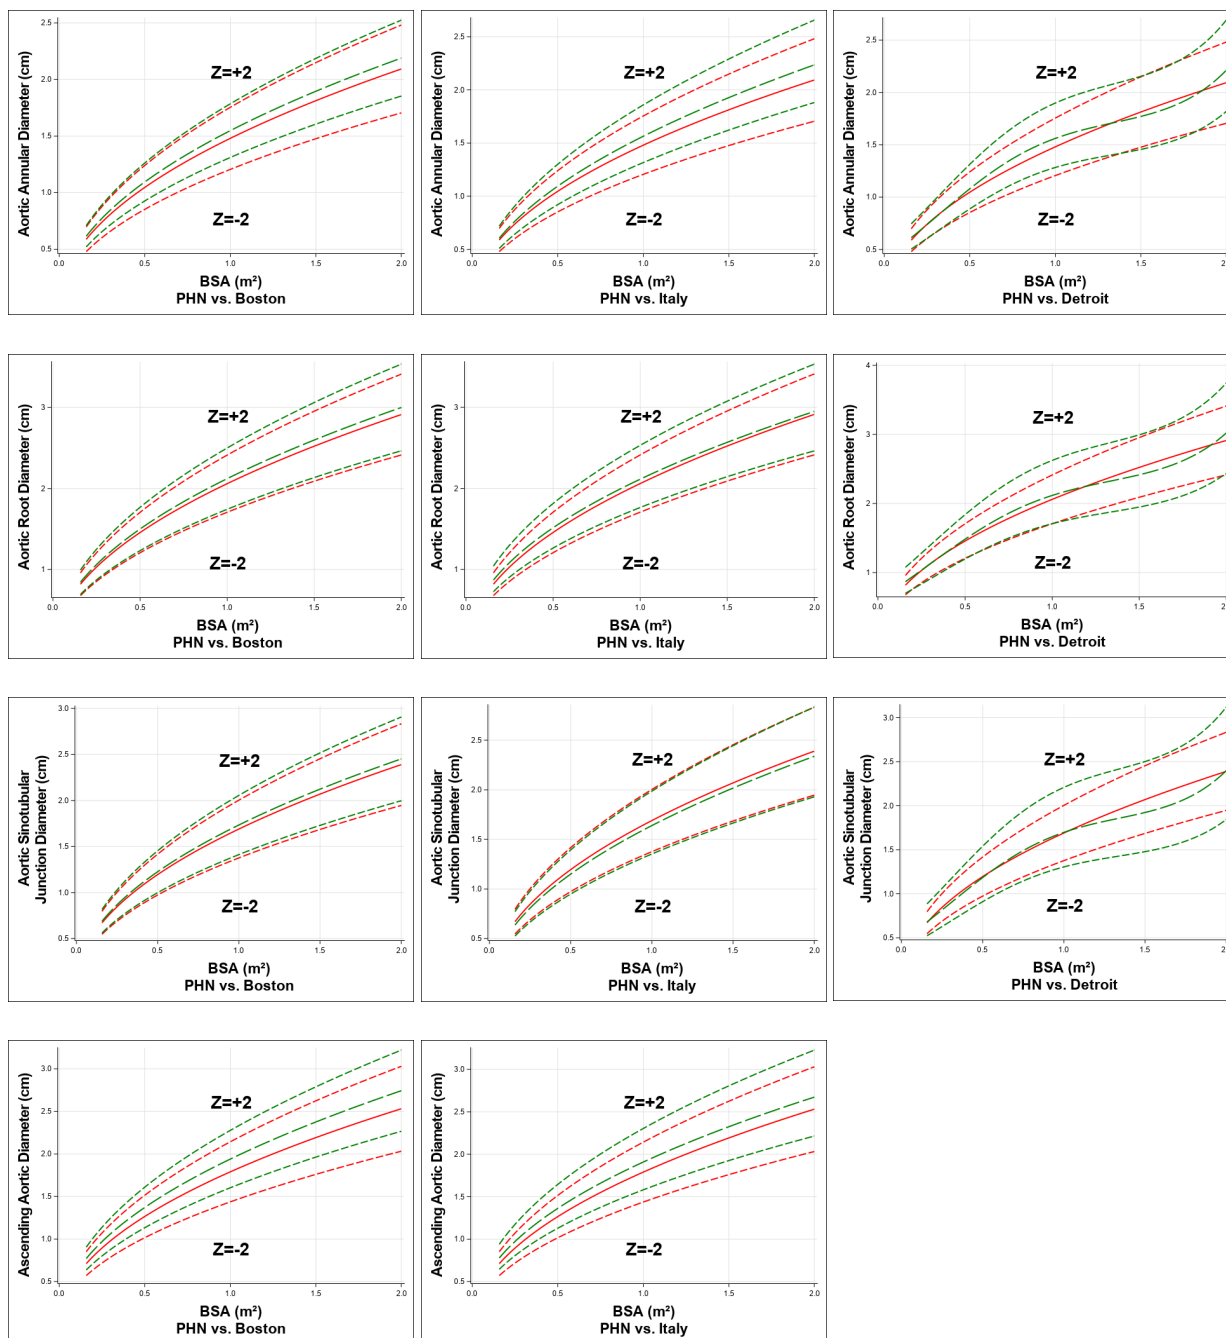

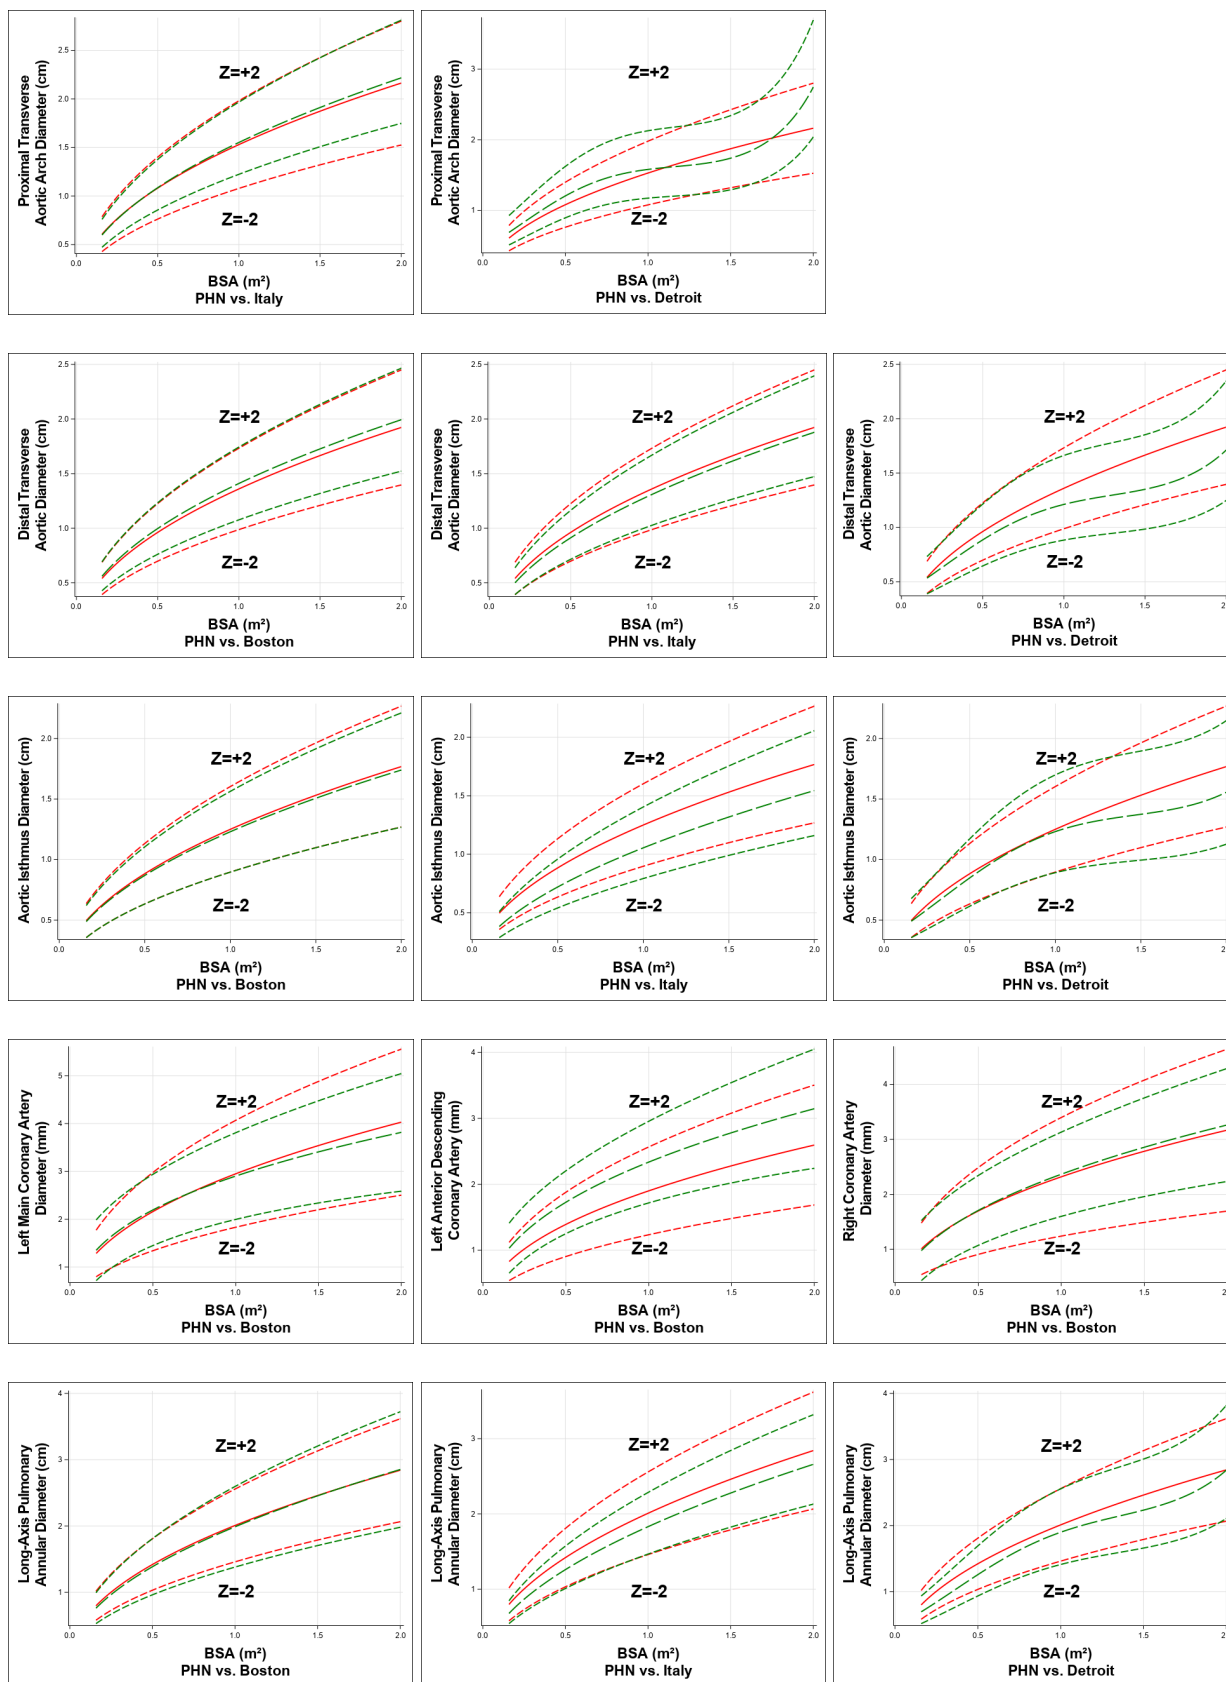

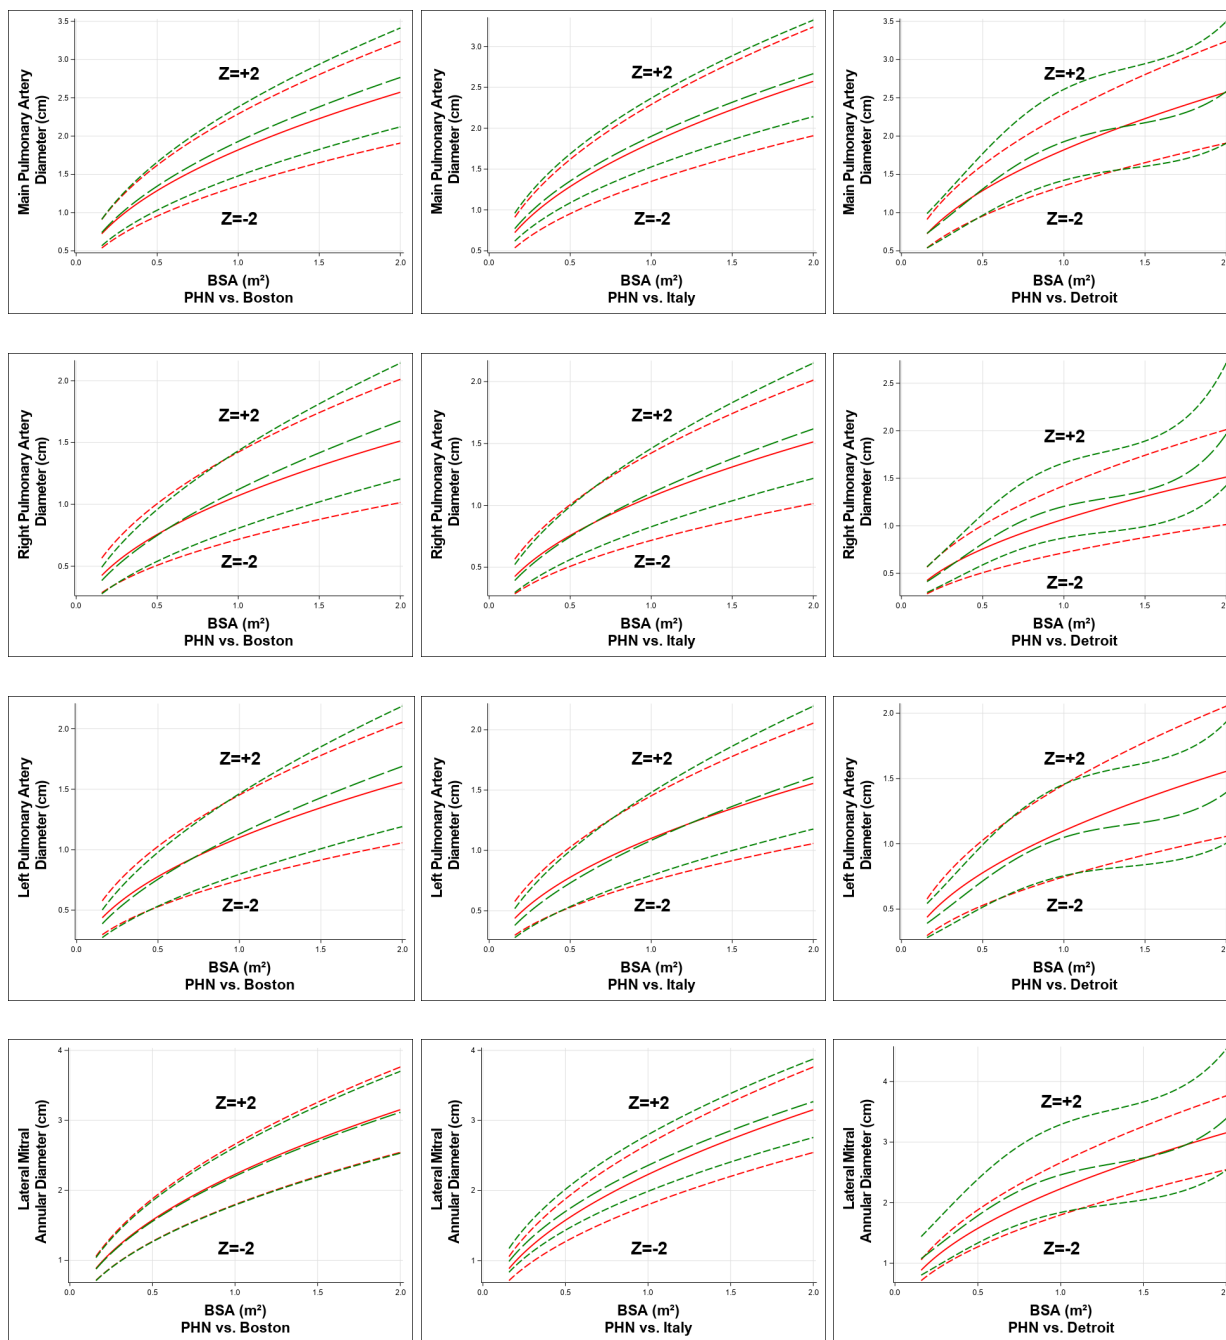

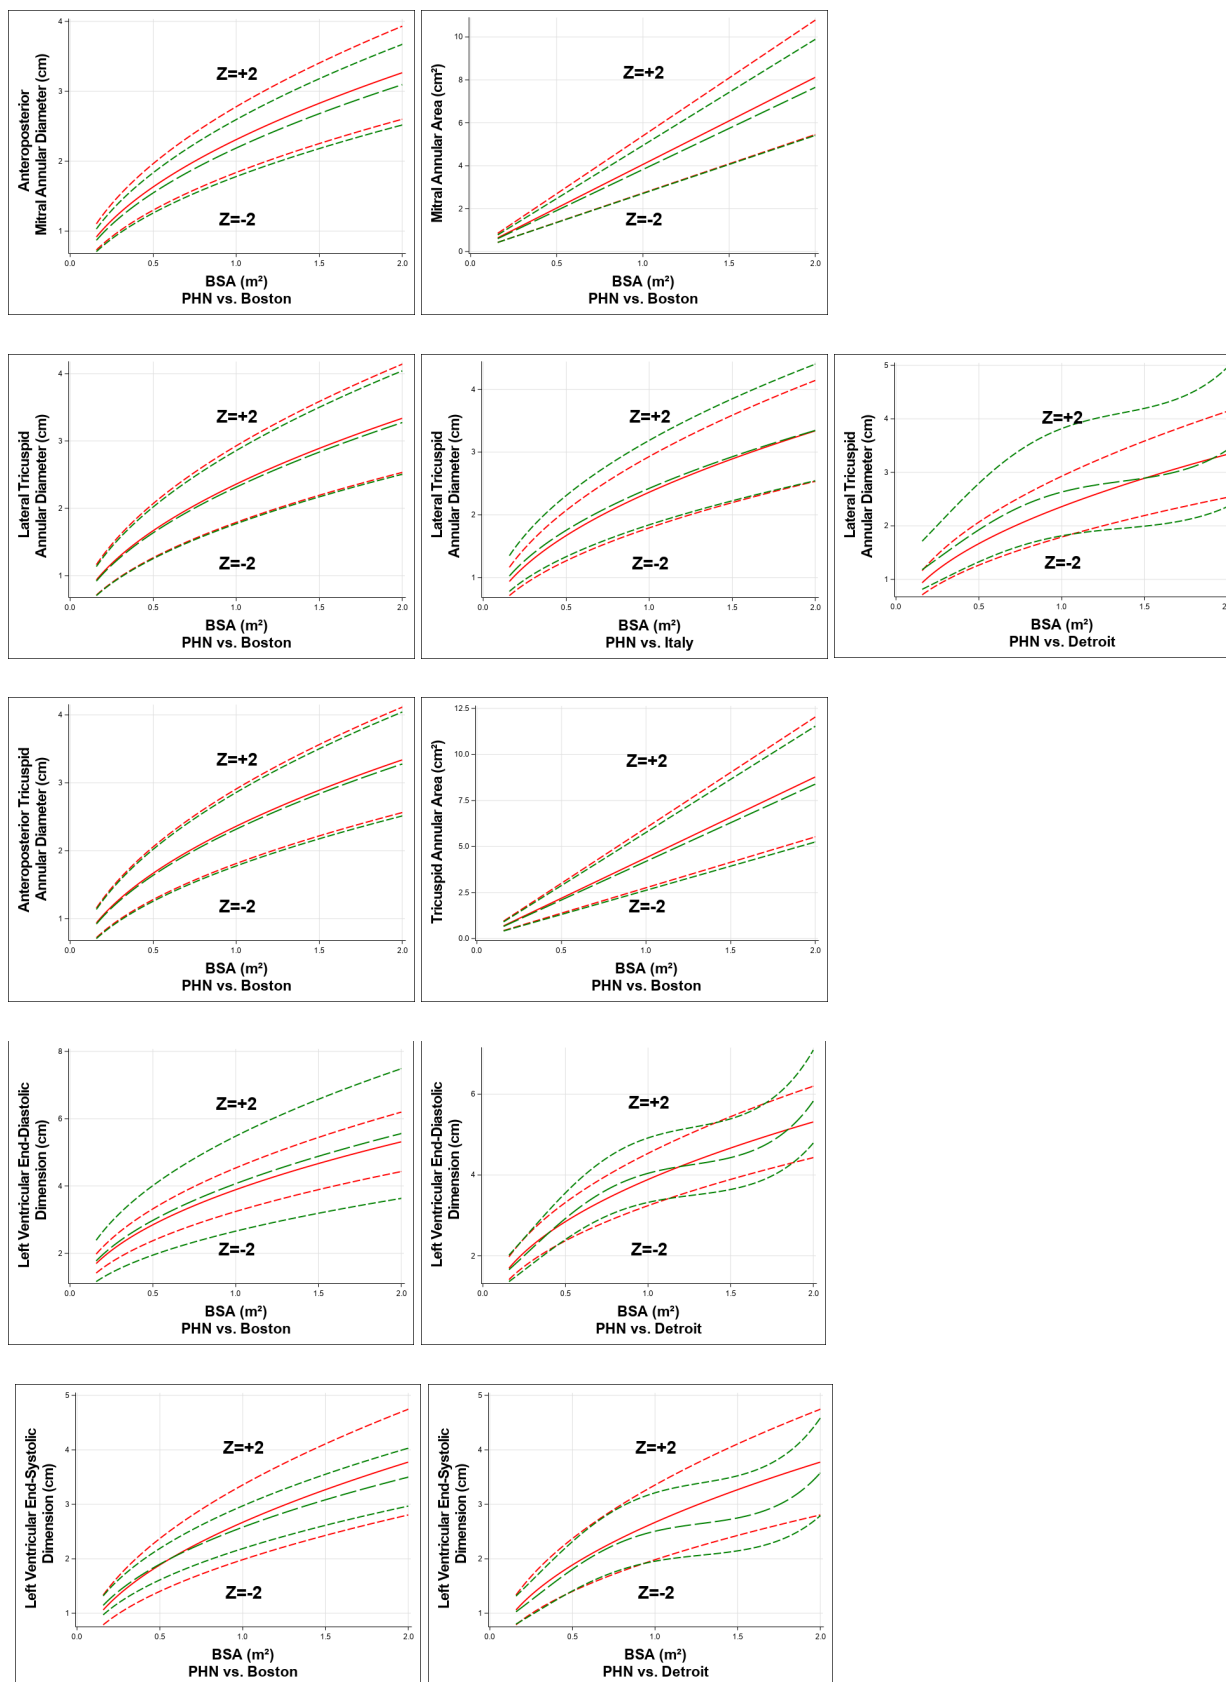

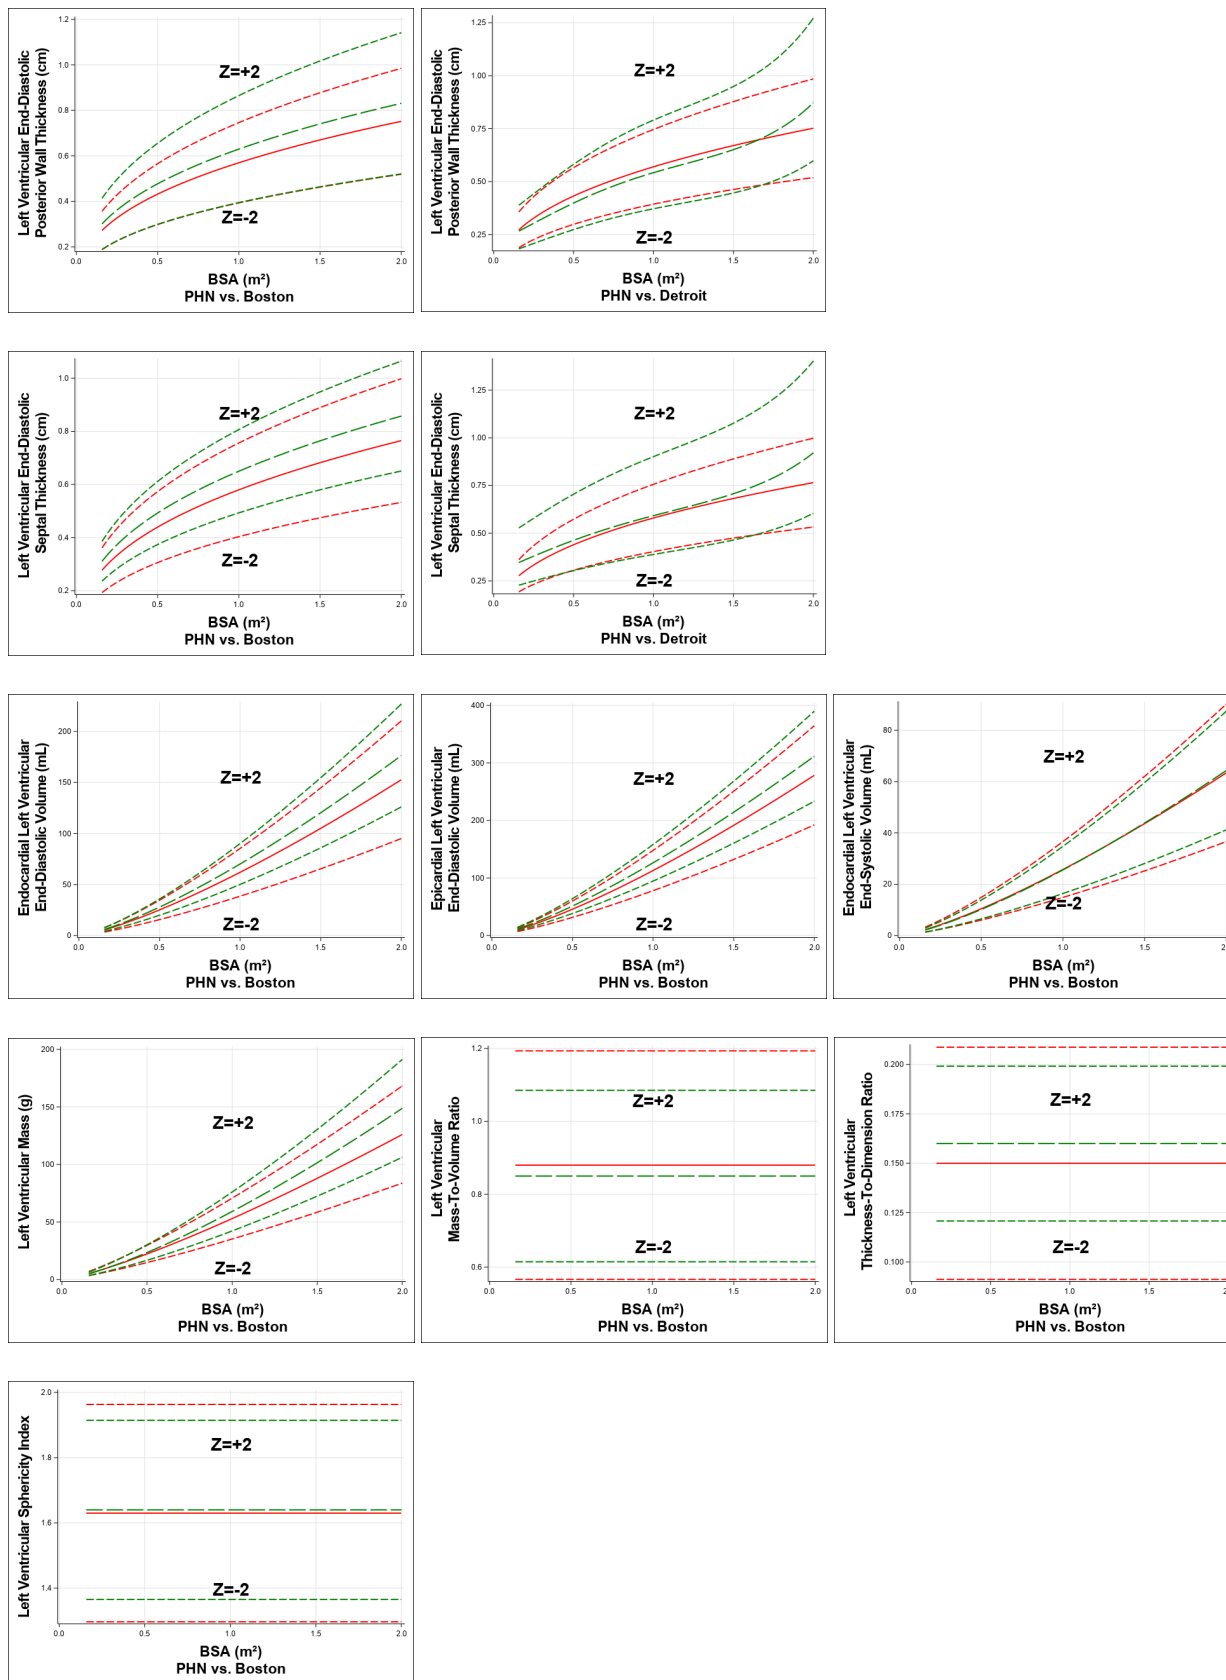

Appendix 2: Scatterplots comparing the PHN Z-scores versus the Boston, Italian, and Detroit Z-scores for all of the parameters (PHN = Pediatric Heart Network).

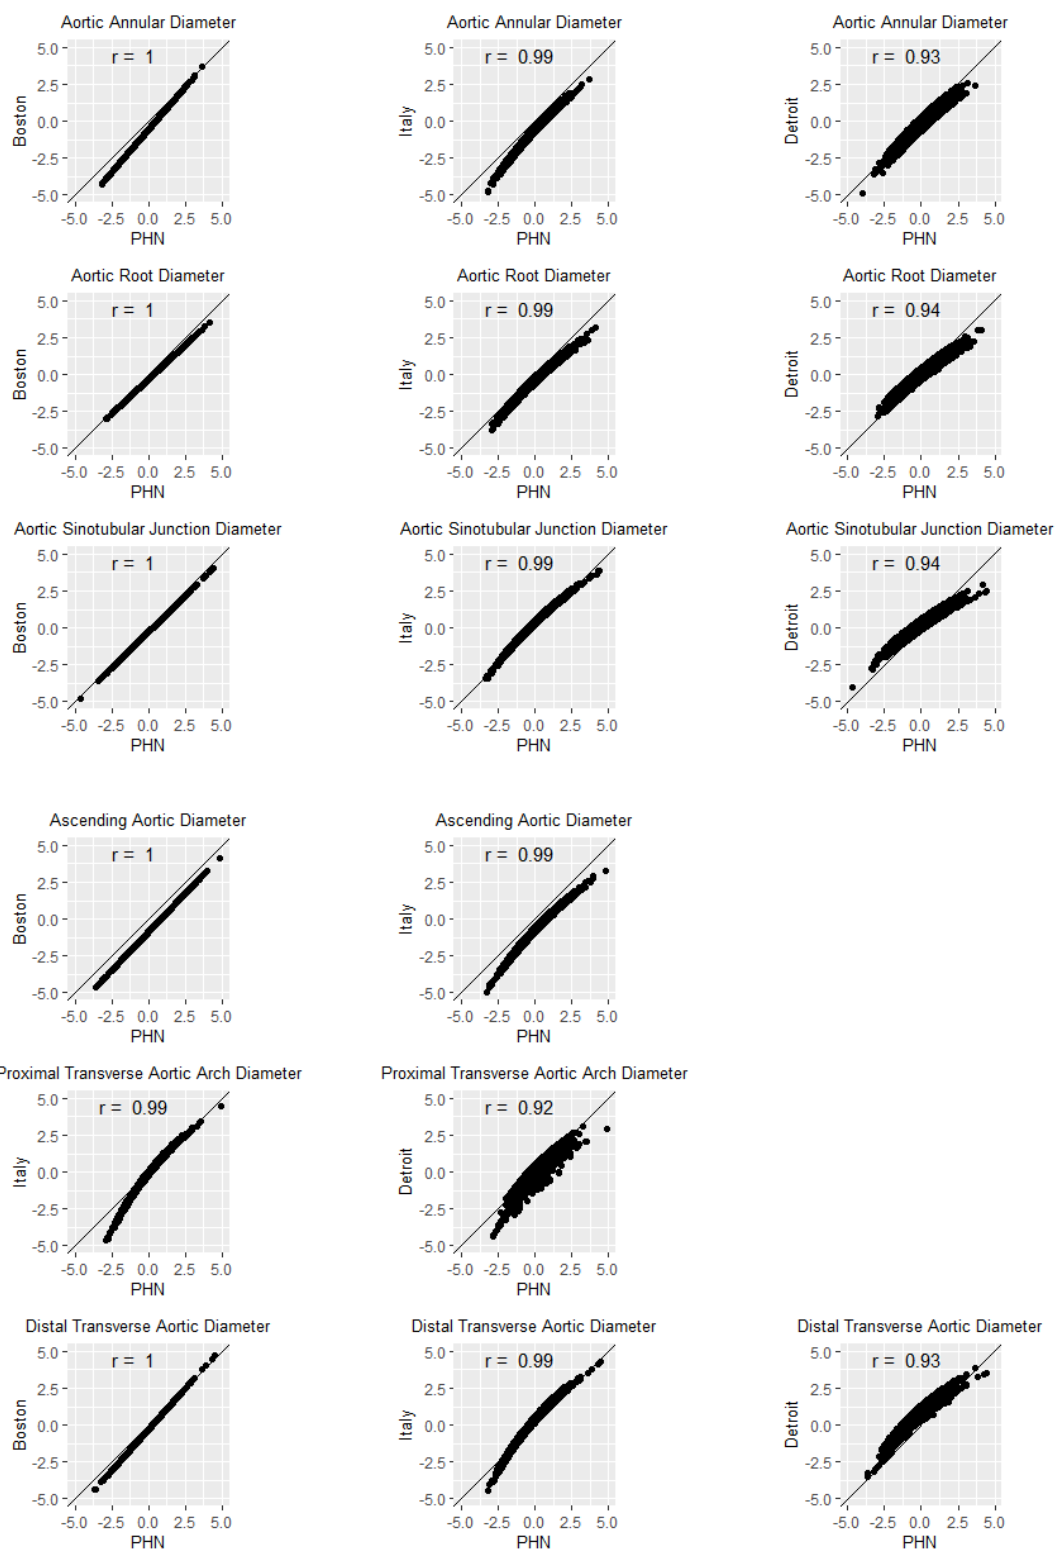

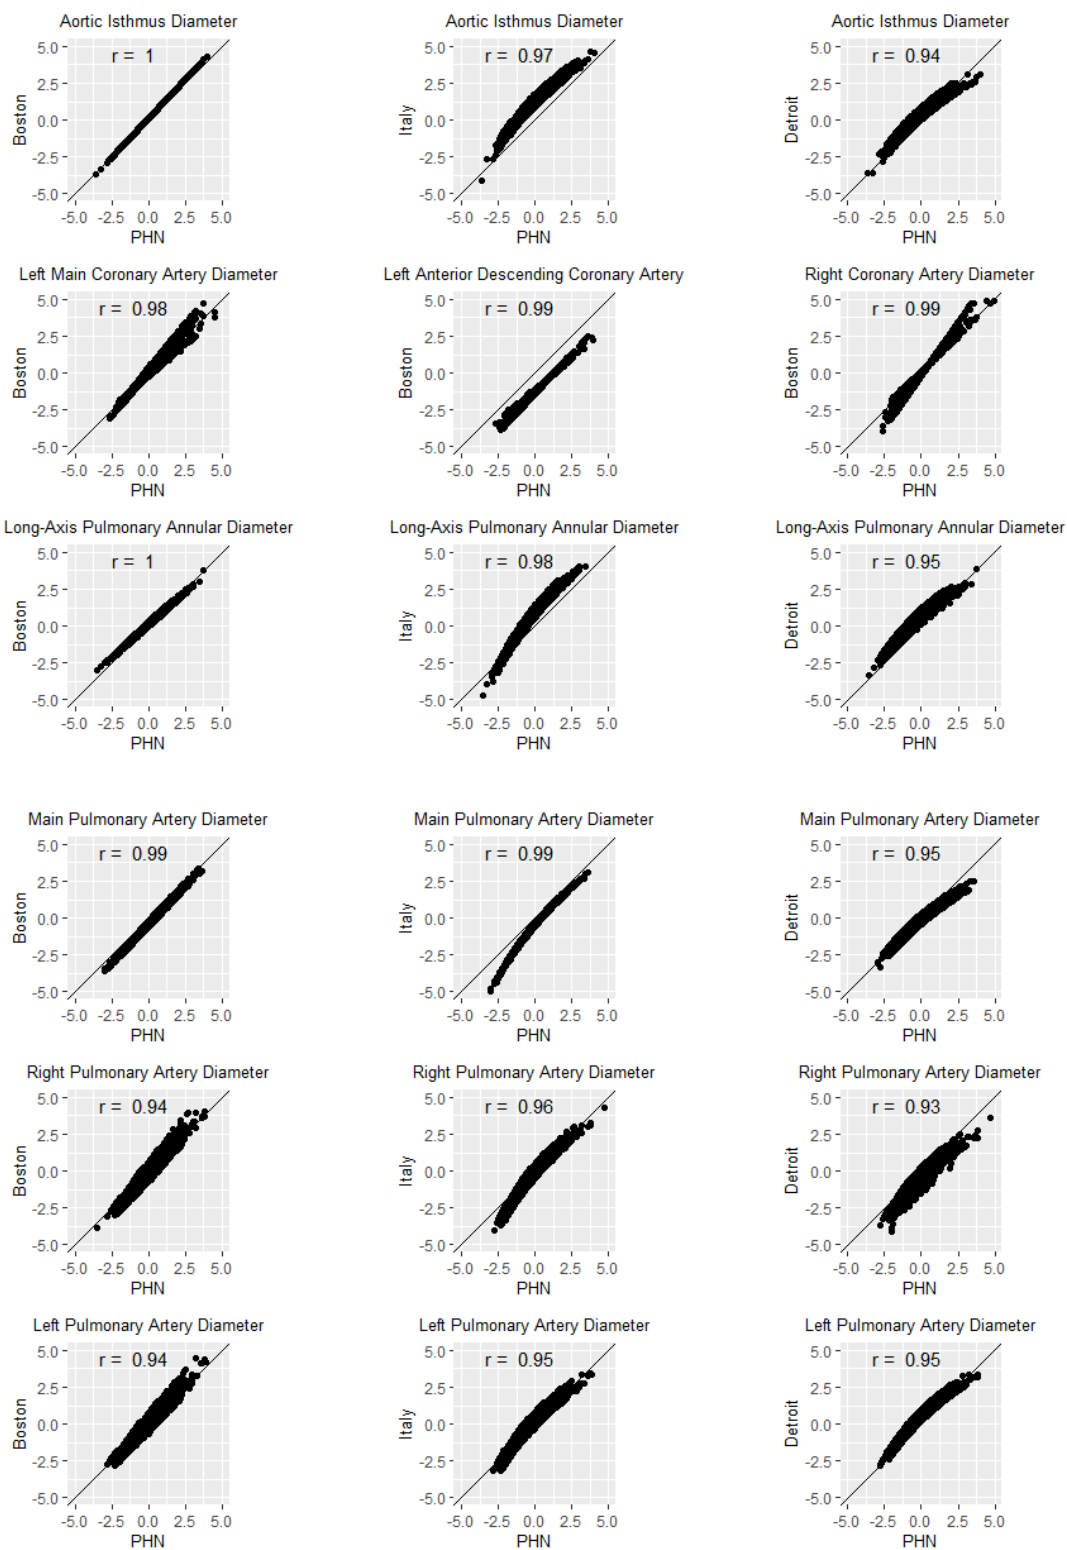

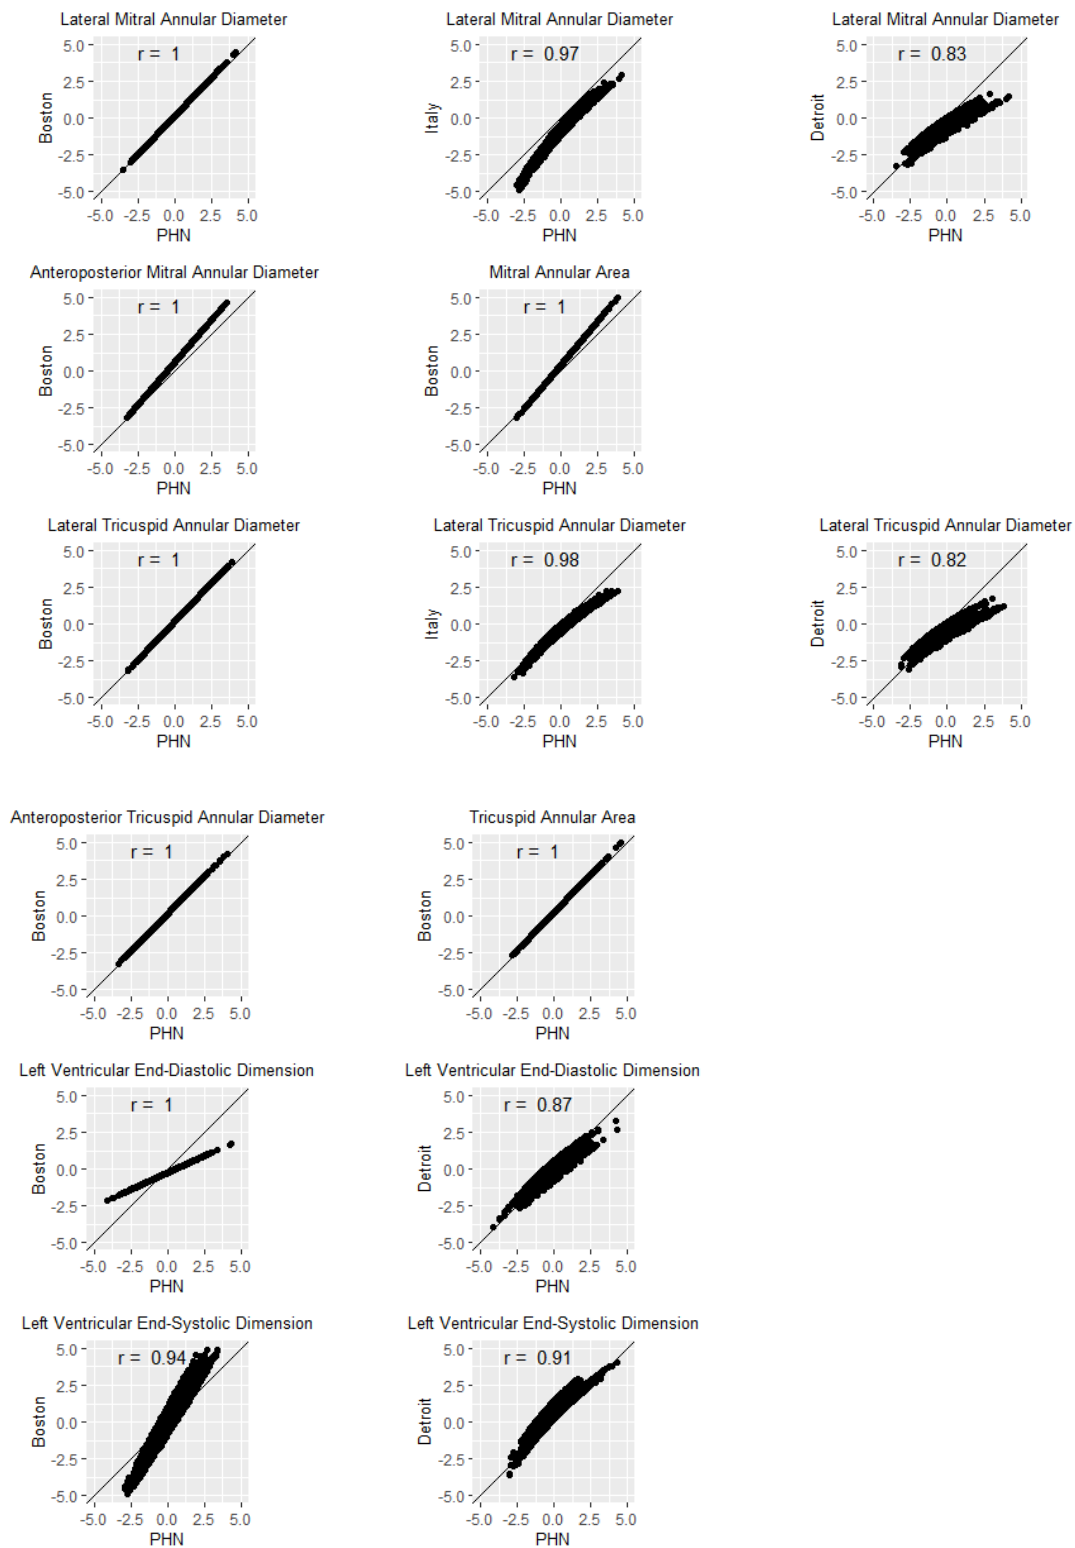



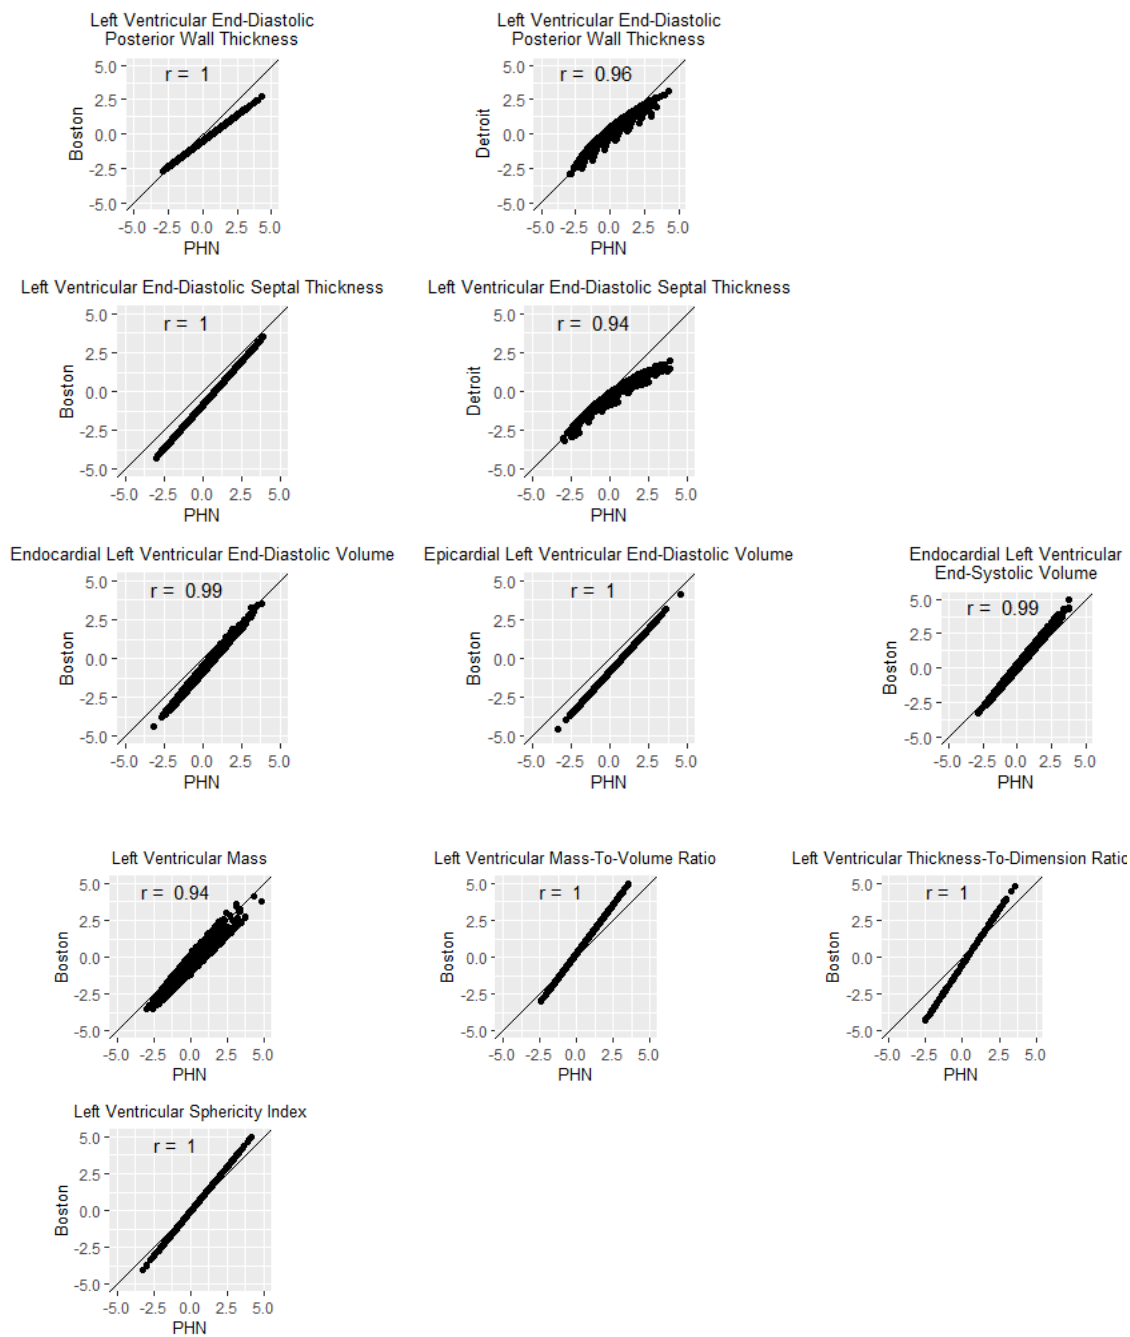

Appendix 3: Bland-Altman plots comparing the PHN Z-scores versus the Boston, Italian, and Detroit Z-scores for all of the parameters. The red line is the 0 reference line and the light blue dashed lines are the 95% confidence interval around the mean difference (dark blue dotted line). (PHN = Pediatric Heart Network).

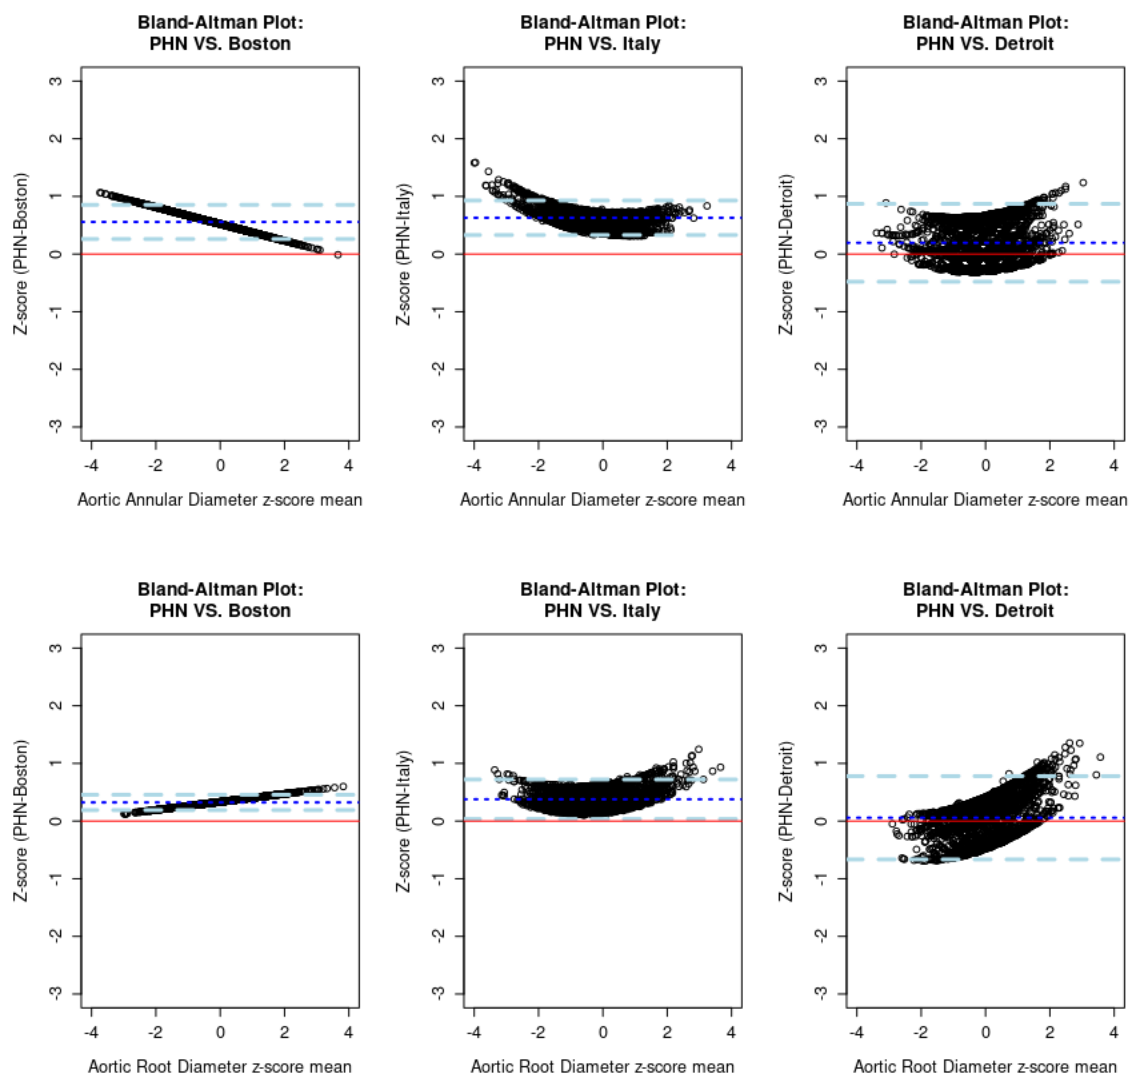

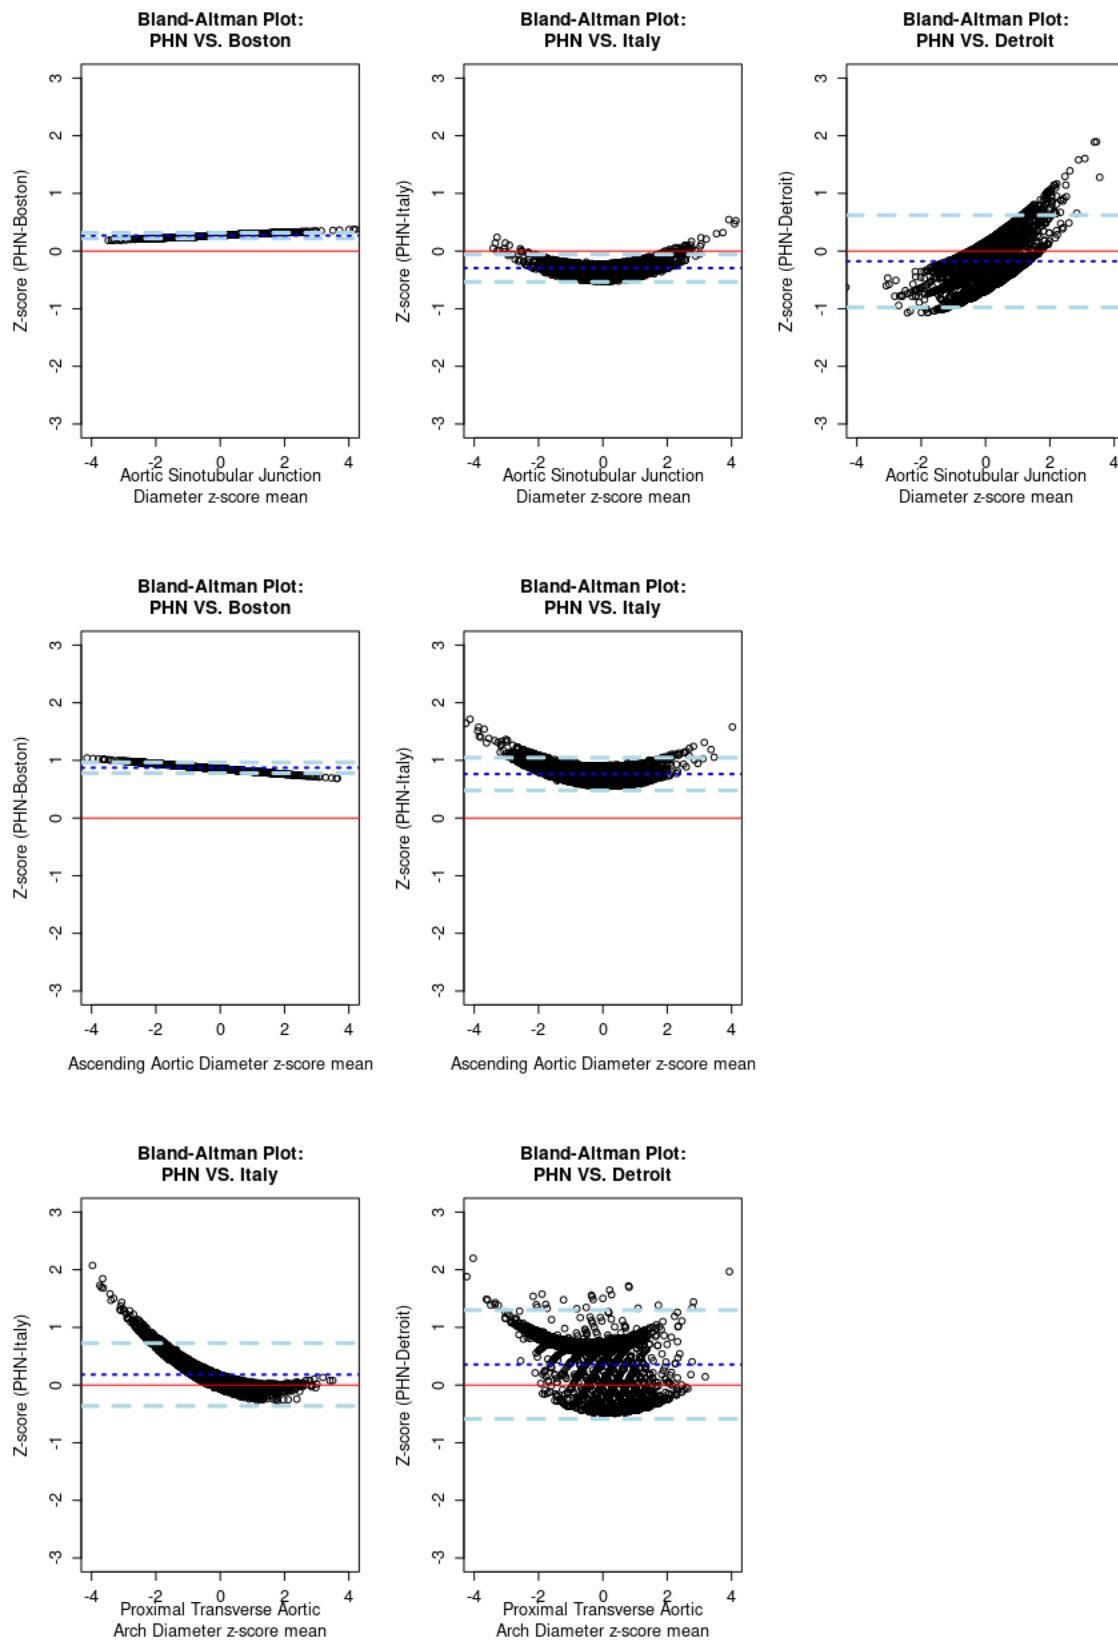

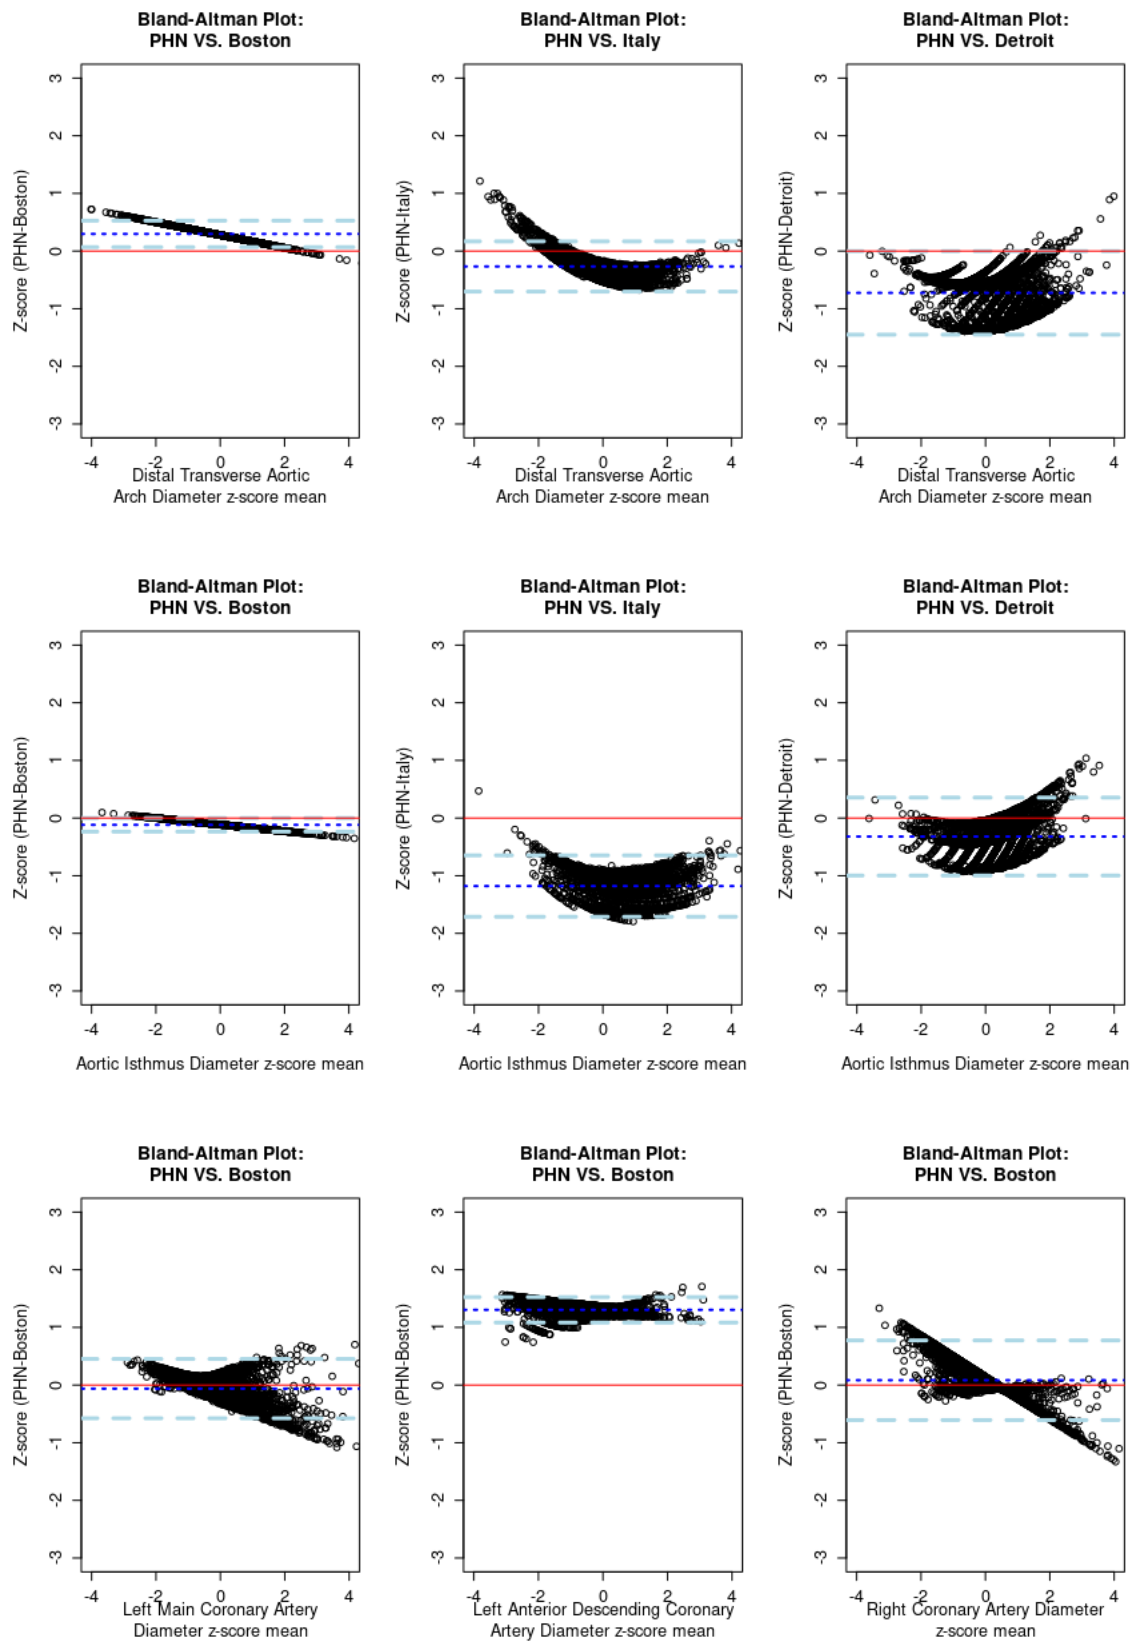

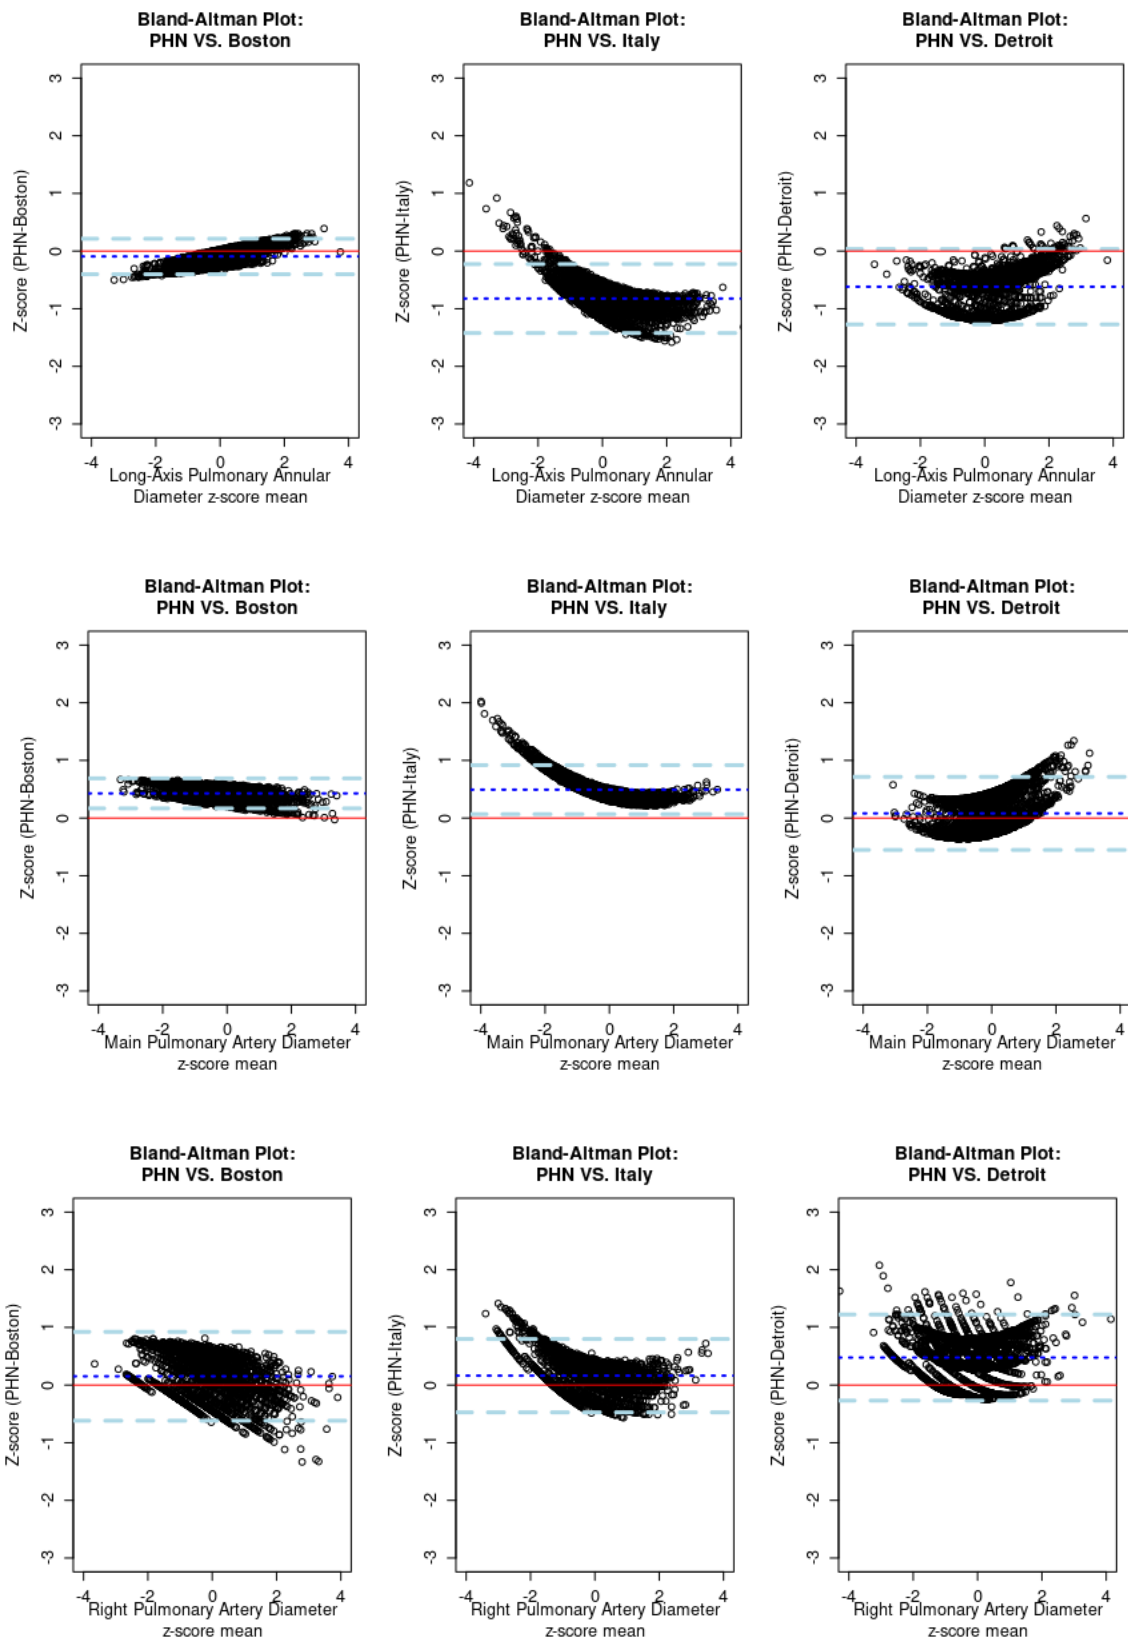

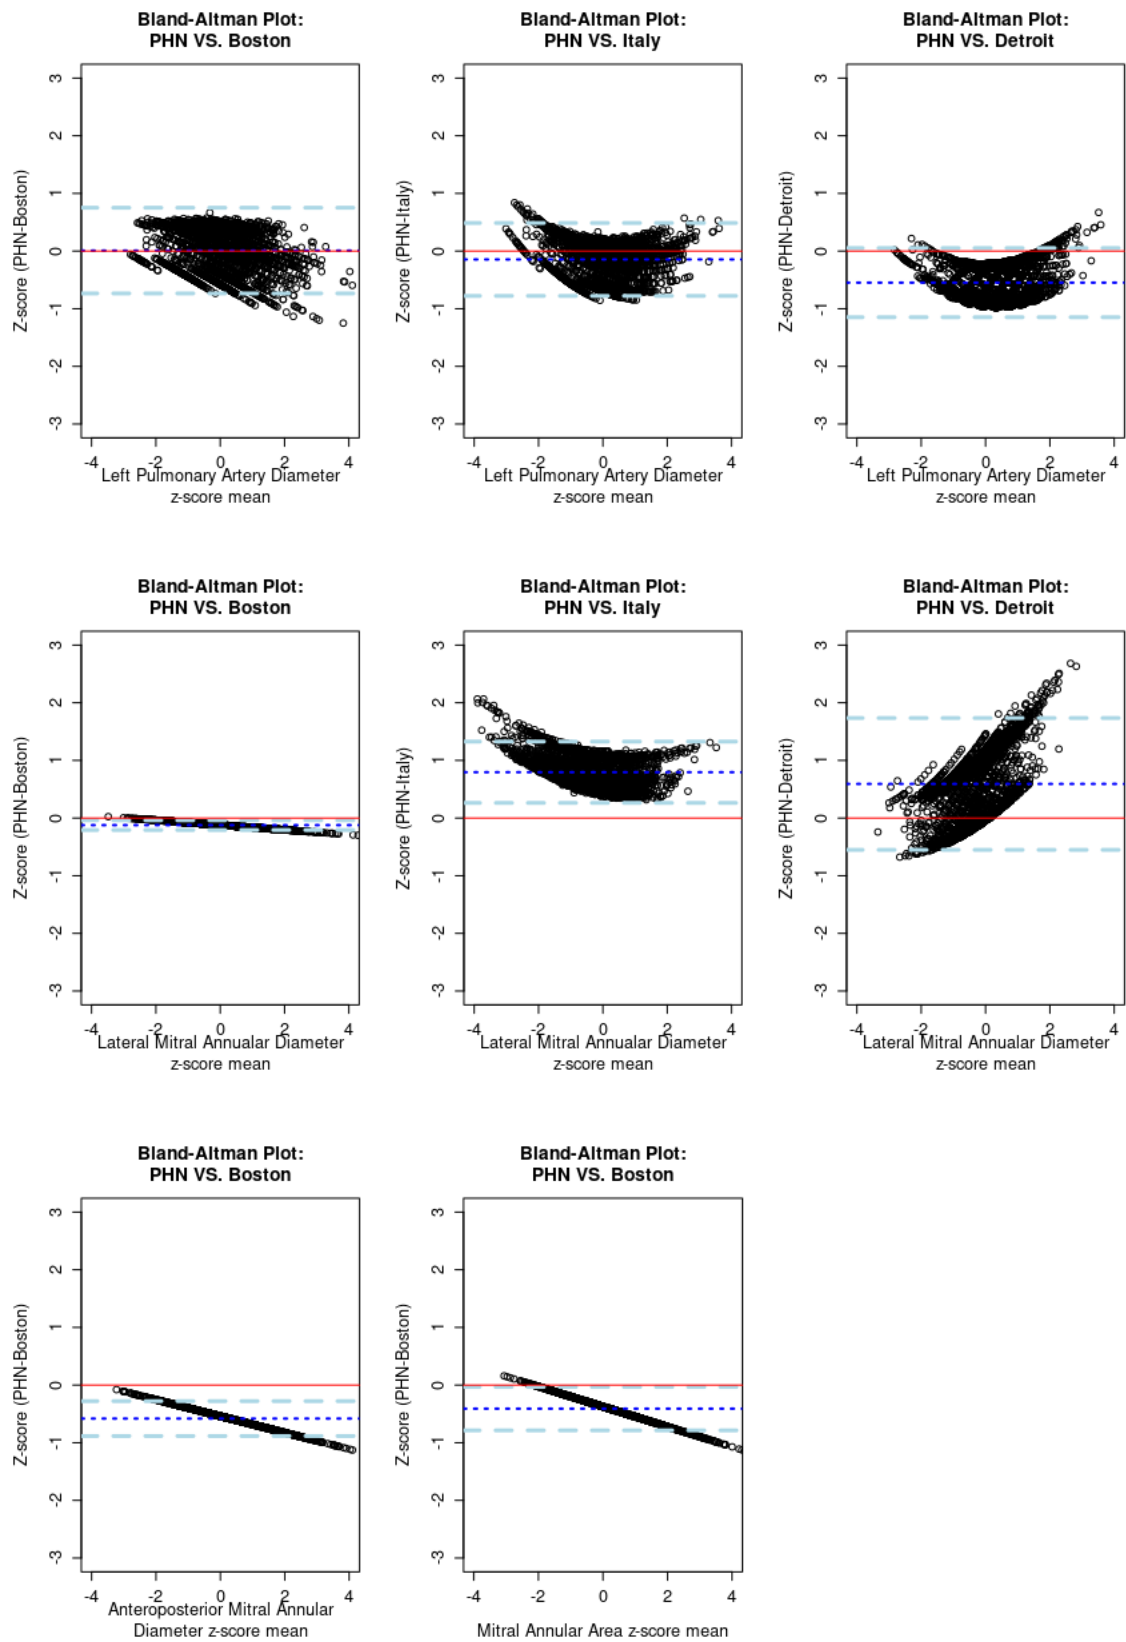

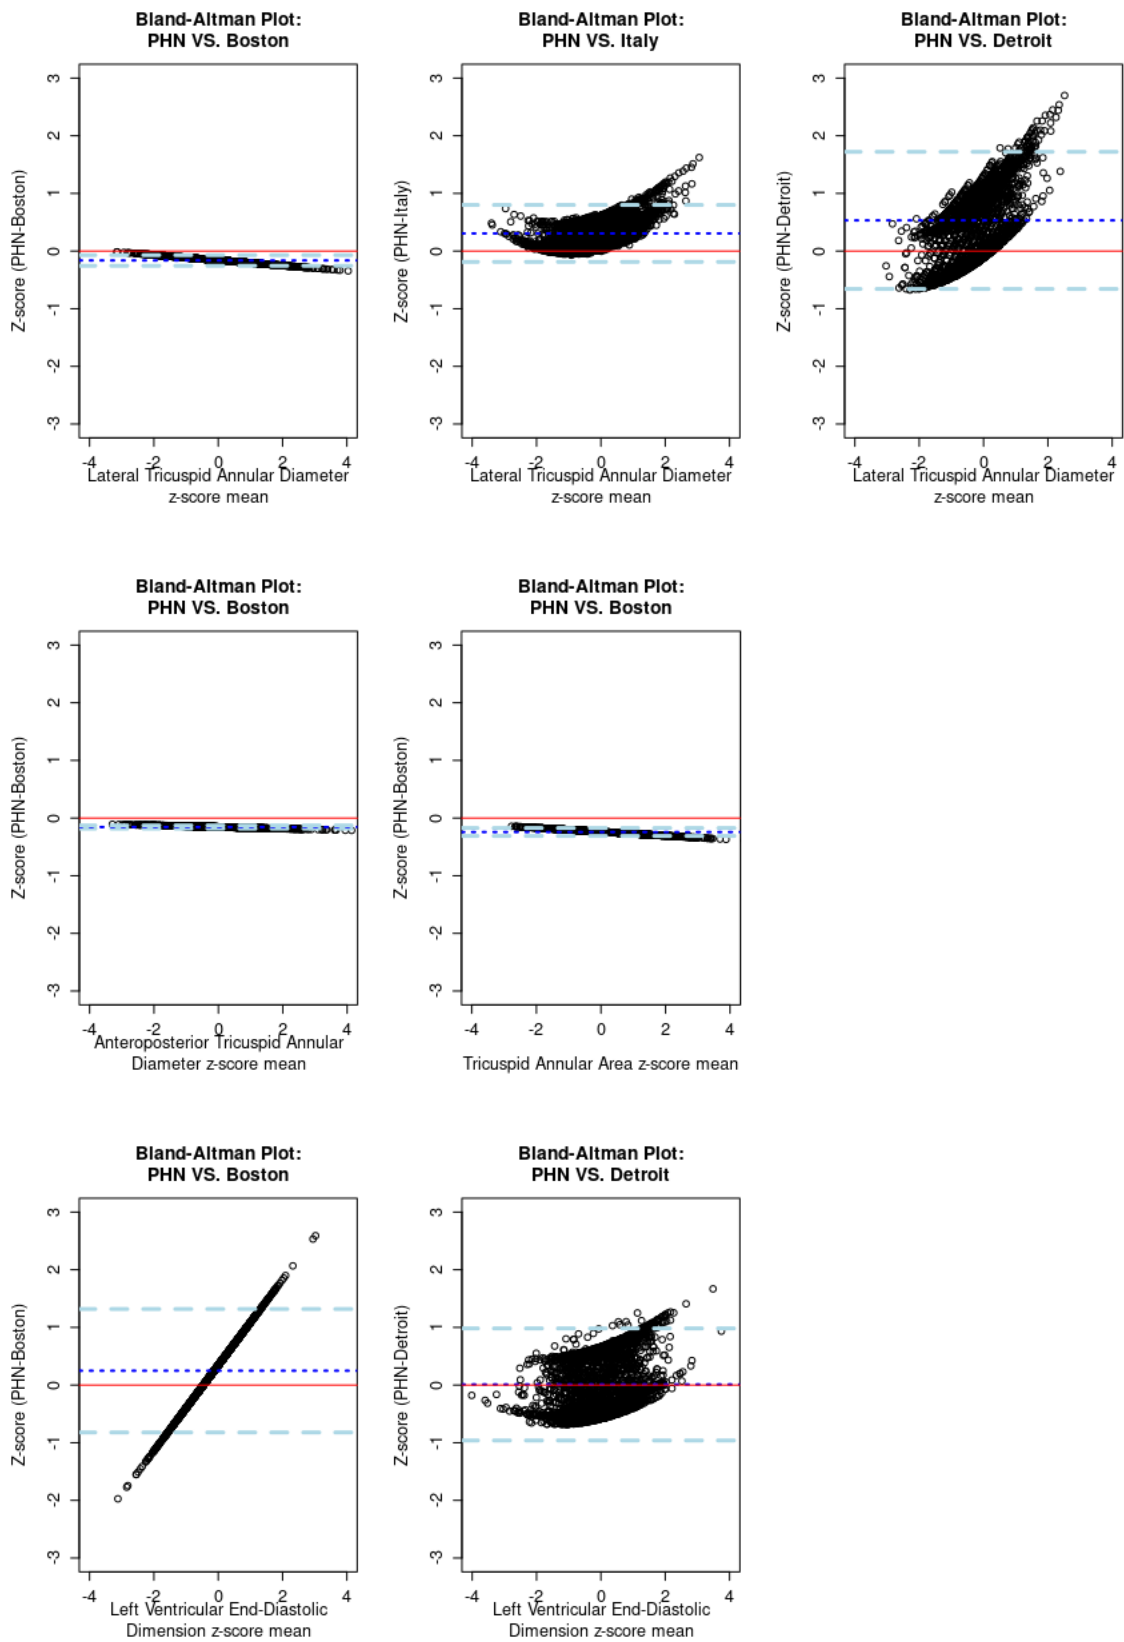

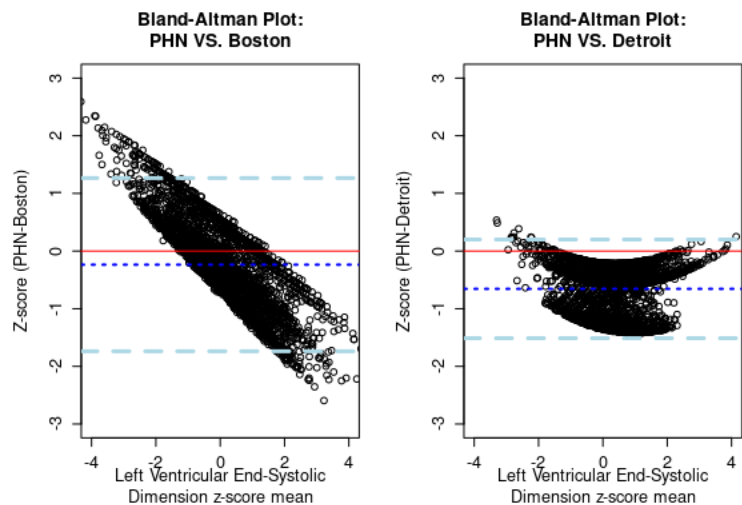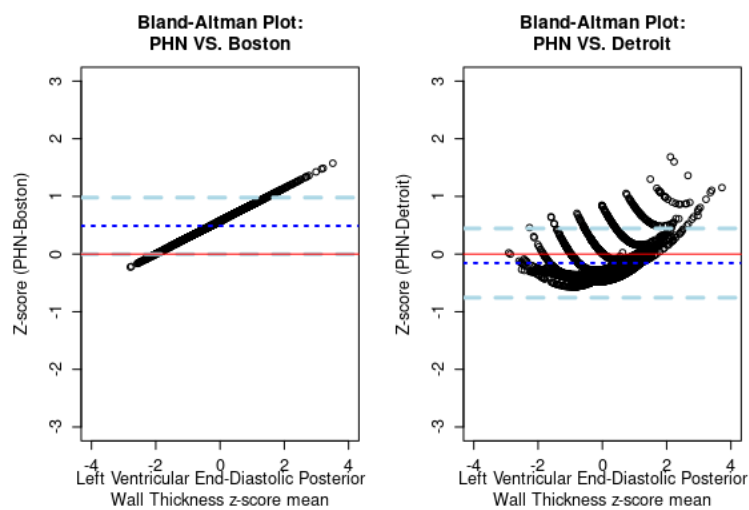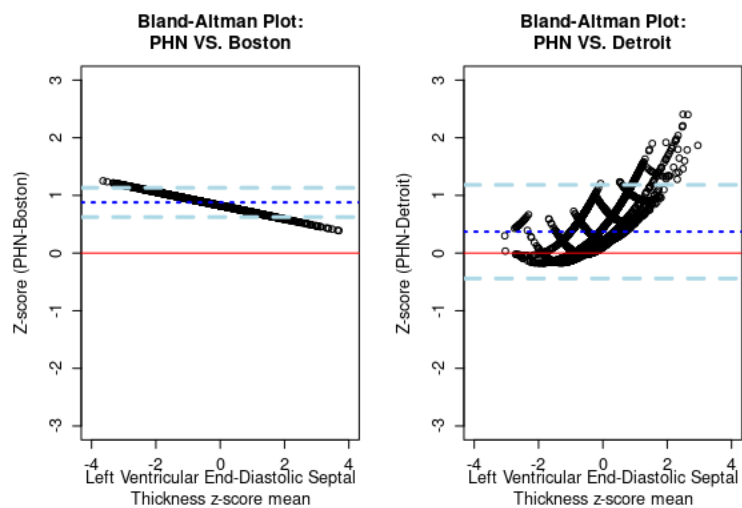



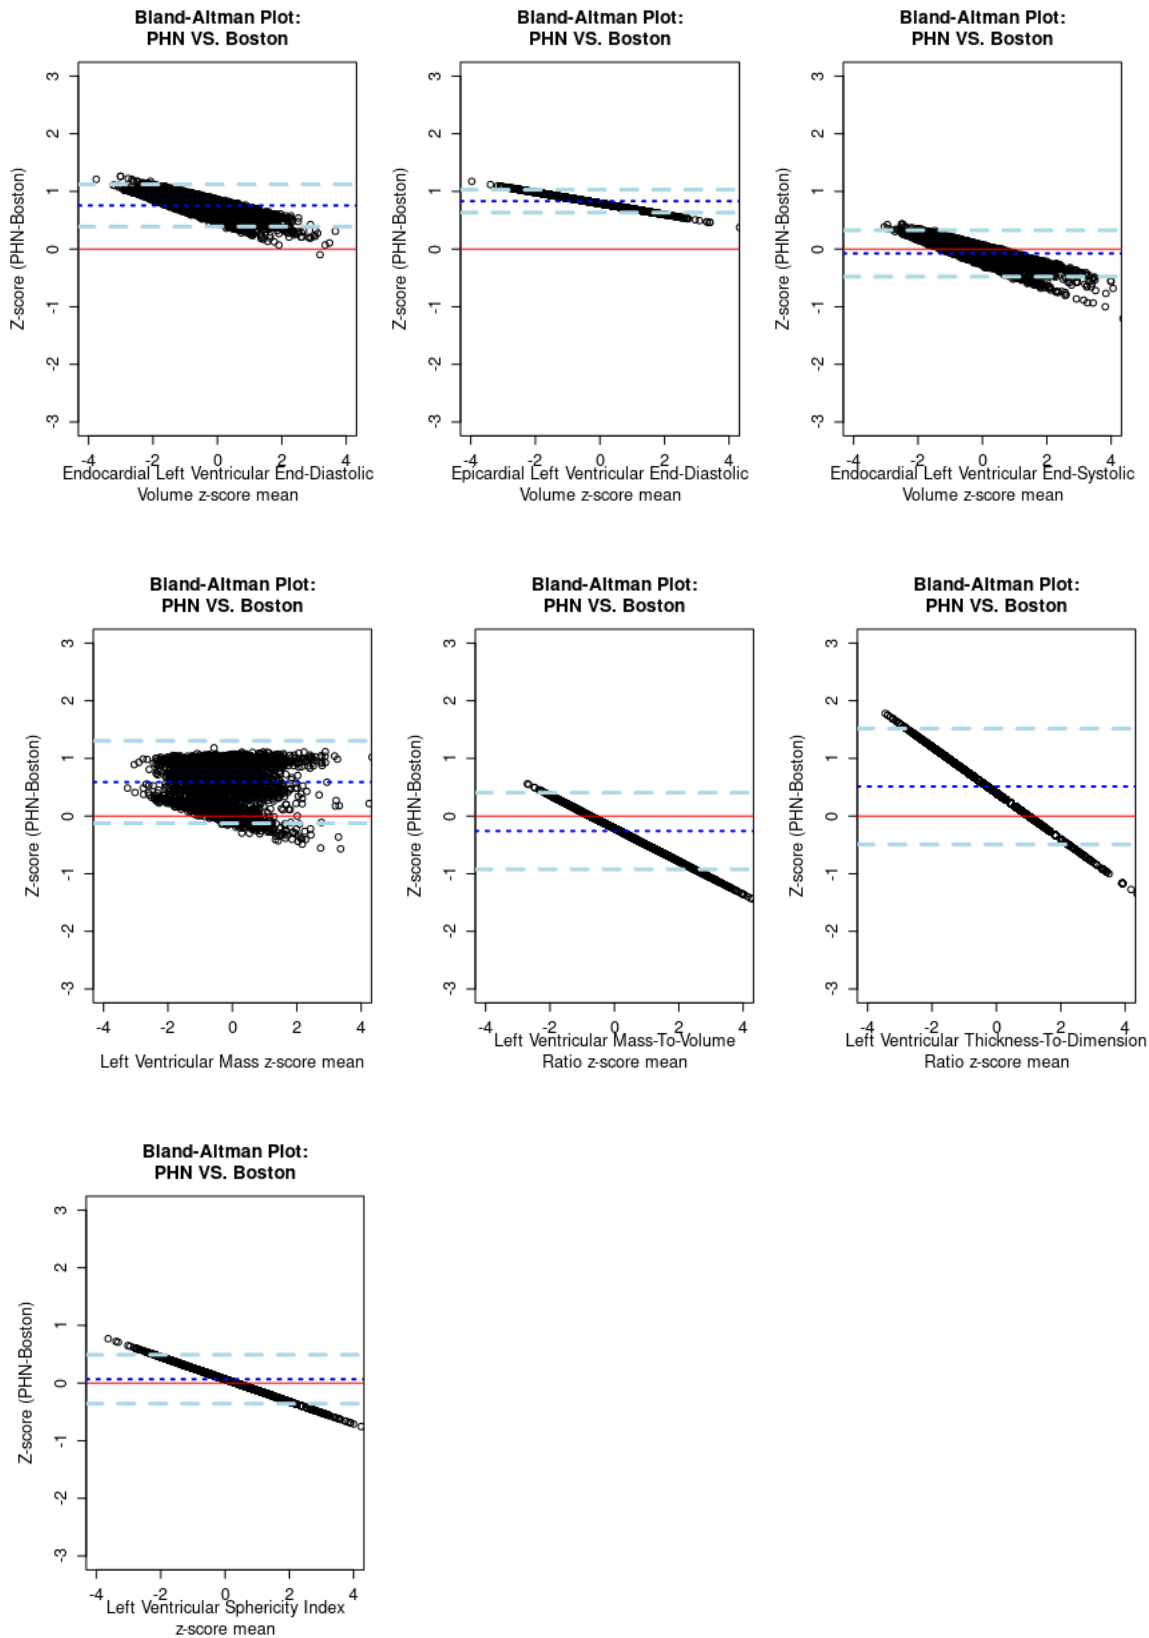

Supplement: NIHMS1647664-supplement-1.pdf [file NIHMS1647664-supplement-1.pdf]
